# Supplementary material for: BurrH: a new modular DNA binding protein for genome engineering
Source: PubMed Central journal article supplement — Sci Rep. 2014 Jan 23;4:3831. doi: 10.1038/srep03831 (PMC5379180; doi:10.1038/srep03831), 2014-01-23
Supplement: srep03831-s1.pdf [file srep03831-s1.pdf]

Supplementary information for:

**BurrH: a new modular DNA binding protein for genome engineering**

Alexandre Juillerat, Claudia Bertonati, Gwendoline Dubois, Valérie Guyot, Séverine Thomas, Julien Valton,  
Marine Beurdeley, George H. Silva, Fayza Daboussi and Philippe Duchateau

CELLECTIS S.A., 8 Rue de la Croix Jarry, 75013 Paris, France.

Correspondence to: Philippe.Duchateau ([philippe.duchateau@collectis.com](mailto:philippe.duchateau@collectis.com)).

Supplementary Figure 1. Juillerat *et al.*

a

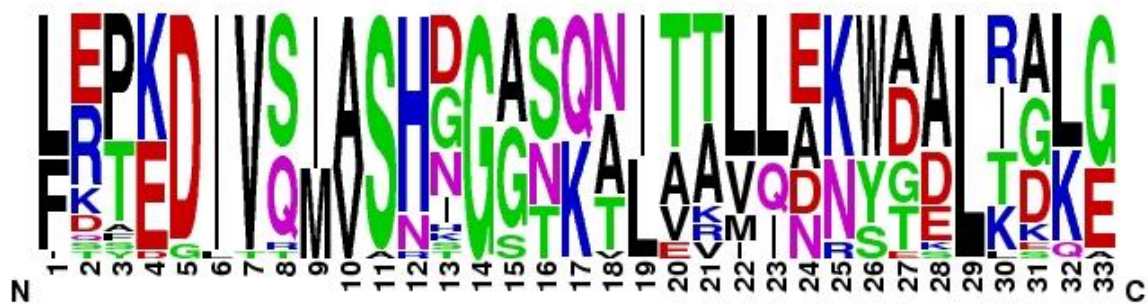

b

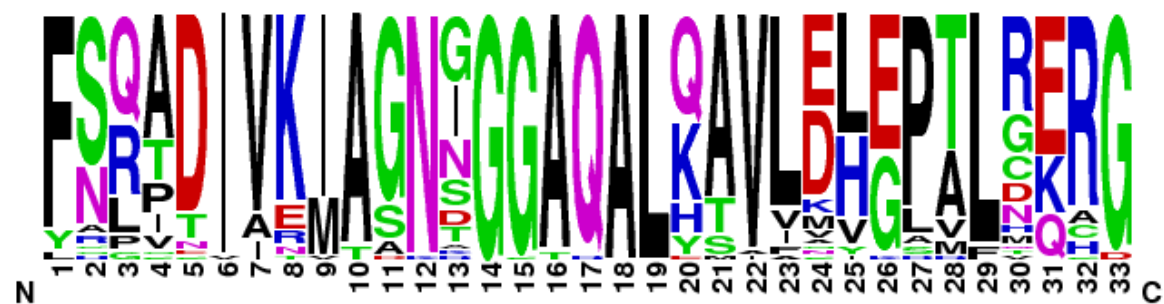

c

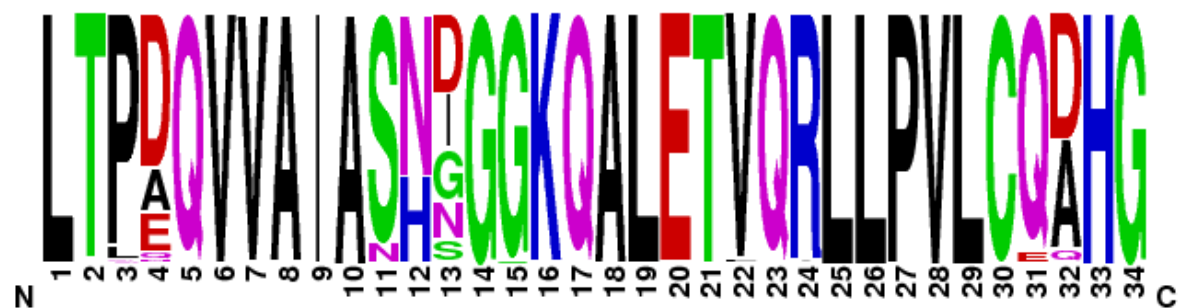

Supplementary Figure 2. Juillerat *et al.*

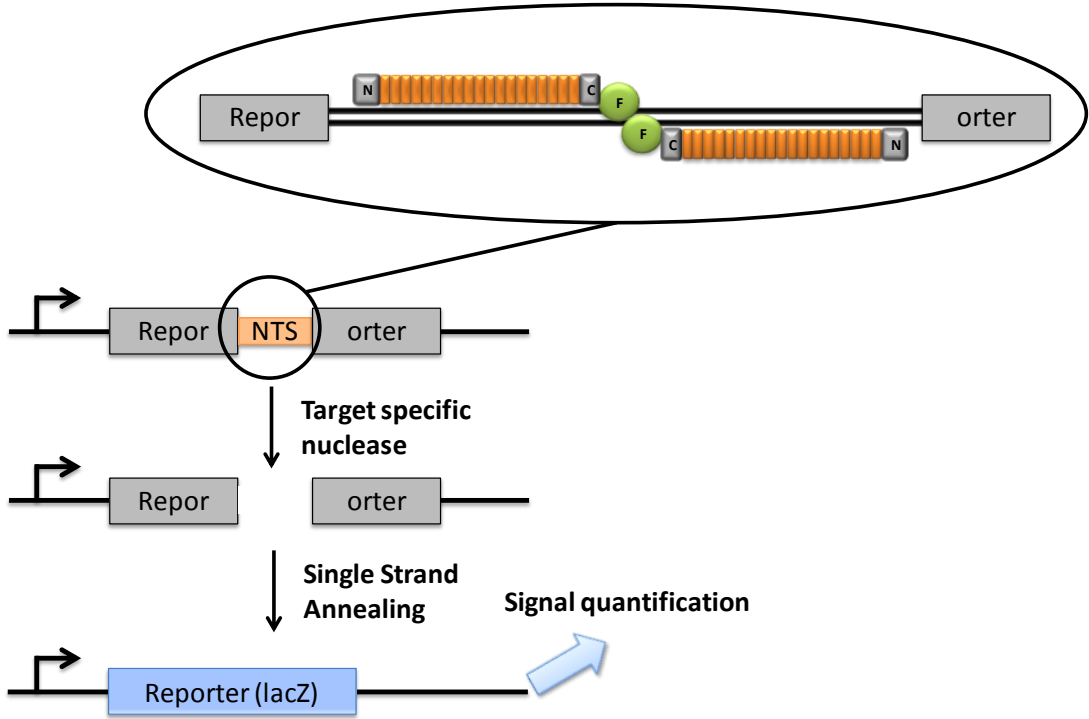

Supplementary Figure 3. Juillerat *et al.*

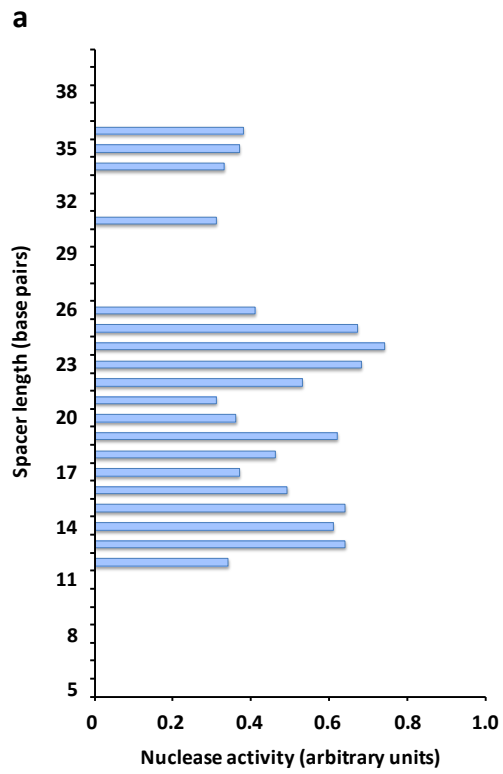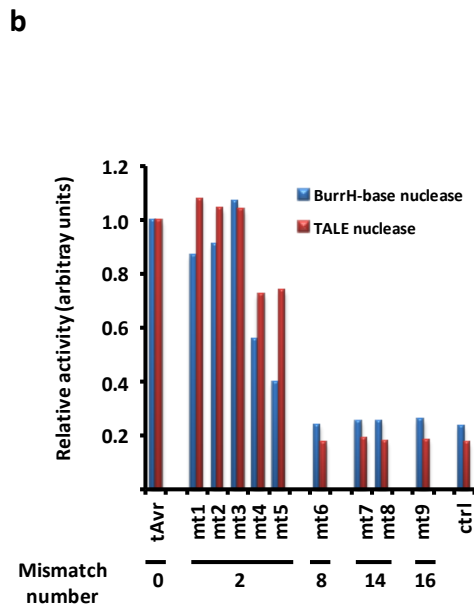

Supplementary Figure 4. Juillerat *et al.*

**a**

WT: aaccccattgtccgggaaccccagagctcacagccacgatcttagaccgagcccacagagccagaggtg

Δ5: aaccccattgtccgggaaccccagagctcaca-----gatcttagaccgagcccacagagccagaggtg (x10)

Δ4a: aaccccattgtccgggaaccccagagctcacagc-----atcttagaccgagcccacagagccagaggtg (x9)

Δ4b: aaccccattgtccgggaaccccagagctcacagcc-----tcttagaccgagcccacagagccagaggtg (x9)

Δ26: aaccccattgtccgggaaccccagagct-----cacagagccagaggtg (x6)

Δ3: aaccccattgtccgggaaccccagagctcacag---cgatcttagaccgagcccacagagccagaggtg (x6)

**b**

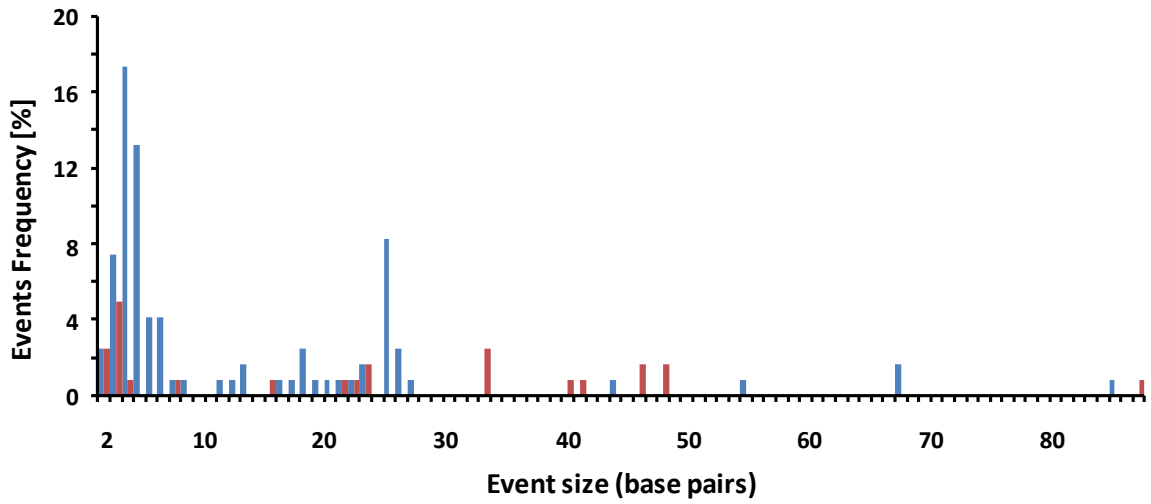

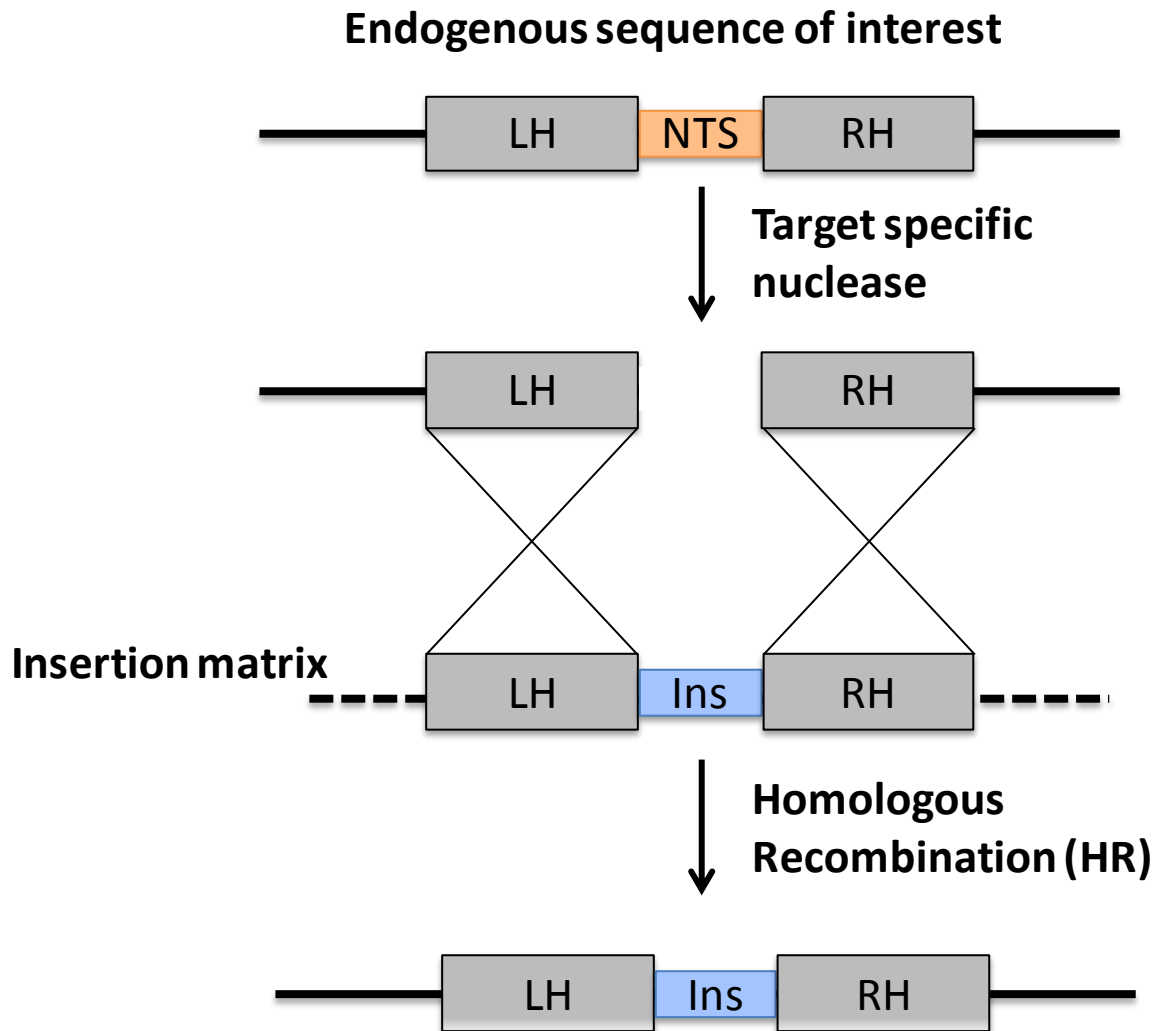

## Supplementary figure Legends

**Figure S1.** (a) Sequence logo representation of the modules of the four fragments belonging to metagenomic sample. (b) Sequence logo representation of the modules of three proteins found in the proteome of *Burkholderia rhizoxinica*. (c) Sequence logo representation of the repeat sequences of the *Xanthomonas* TALE family. WEBLOGO software was used to create the logos.

**Figure S2.** A reporter plasmid containing a Nuclease Target Sequence (NTS) is flanked by overlapping truncated LacZ genes. Upon target cleavage in yeast, the restoration of the LacZ marker through the single strand annealing (SSA) pathway of recombination restores a functional LacZ gene, which can be quantified and related to the nuclease efficiency

**Figure S3.** (a) A collection of 36 targets comprising two AvrBs3 sequences facing each other on both DNA strand with spacer length (between the two targets) ranging from 5 to 40 bp were designed and assayed in the yeast SSA assay using the BurrH-based nuclease bn18473 to determine the optimal cleavage conditions. (b) To evaluate the impact of mismatches on the nuclease activity, a collection of 9 targets containing 2, 8, 14 or 16 mutations with respect to the AvrBs3 target (tAvr) were assayed in the yeast SSA assay using the BurrH-based nuclease bn18473 and an engineered AvrBs3 TALEN. Activity on the reference target (0 mutations) was normalized to 1 for each of the two nucleases. The control is a point without nuclease. N≥6.

**Figure S4.** (a) Alignment of the WT genomic sequence and the most predominant events (deletions are indicated by dashes) induced by the BurrH nuclease (18 modules) at the CAPNS1 locus. Binding sites of the two half BurrH-based nuclease are underlined. (b) Size repartition of the deletions (blue bars) and insertions (red bars) events induced at the CAPNS1 locus by the BurrH nuclease composed of 18 modules.

**Figure S5.** Schematic of the *in vivo* targeted gene insertion strategy. The donor DNA consists of two homologous regions (LH, left homology; RH, right homology) flanking a central insert sequence. Double strand breaks resulting from the nuclease activity at the NTS can be repaired by homologous recombination with the donor DNA, resulting in specific insertion events.

**Supplementary table 1. Juillerat et al.**

Amino acid sequences of N-terminal (including a NLS and a HA tag) domain, central DNA binding core and C-terminal (including FokI) domains of the WT BurrH-based nuclease (bn17421) with the targeted sequence (upper case, spacer in lower case)

|                         |                                                                                                                                                                                                                                                                                                                                                                                                                                                                                                                                                                                                                                                                                                                                  |
|-------------------------|----------------------------------------------------------------------------------------------------------------------------------------------------------------------------------------------------------------------------------------------------------------------------------------------------------------------------------------------------------------------------------------------------------------------------------------------------------------------------------------------------------------------------------------------------------------------------------------------------------------------------------------------------------------------------------------------------------------------------------|
| <b>Nter Sequence</b>    | MGDPKKKRKVIDYPYDVPDYAIDIASTAFVDQDKQMANRLNLSPLERSKIEKQYGGATTLAFISNKQ<br>NELAQILSRADILKIASYDCAAHALQAVLDCGPMLGKRG                                                                                                                                                                                                                                                                                                                                                                                                                                                                                                                                                                                                                   |
| <b>DNA binding core</b> | FSQSDIVKIAGNIGGAQALQAVLDLESMLGKRGFSRDDIAKMAGNIGGAQTLQAVLDLESAPFRERGF<br>SQADIVKIAGNNGGAQALYSVLDVEPTLGKRGFSRADIVKIAGNTGGAQALHTVLDLEPALGKRGFS<br>RIDIVKIAANNGGAQALHAVLDLGPTRLRECGFSQATIAKIAGNIGGAQALQMVLDLGPALGKRGFSQ<br>ATIAKIAGNIGGAQALQTVLDLEPALCERGFSSQATIAKMAGNNGGAQALQTVLDLEPALRKRDFRQA<br>DIIKIAGNDGGAQALQAVIEHGPTLRQHGFNLADIVKMAGNIGGAQALQAVLDLKPVLDEHGFSQPD<br>IVKMAGNIGGAQALQAVLSLGPALRERGFSSQPDIVKIAGNTGGAQALQAVLDLELTLVEHGFSQPDI<br>VRITGNRGGQALQAVLALELTLRERGFSSQPDIVKIAGNSGGAQALQAVLDLELTLFRERGFSSQADIV<br>KIAGNDGGTQALHAVLDLERMLGERGFSSRADIVNVAGNNGGAQALKAVLEHEATLNERGFSSRADIVK<br>IAGNGGGAQALKAVLEHEATLDERGFSSRADIVRIAGNGGGAQALKAVLEHGPTLNERGFNLTDIVEM<br>AANSGGAQALKAVLEHGPTLRQRGLSLIDIVEIASNGGAQALKAVLKYGPVLMQAG |
| <b>Cter Sequence</b>    | RSNEEIVHVAARRGGAGRIRKMVAPLLERQGRSGSDPISRSQLVKSELEEKKSELRHKLKYPHEYI<br>ELIEIARNSTQDRILEMKVMEFFMKVYGYRGKHLGGSRKPDGAIYTVGSPIDYGVIVDTKAYSSGGYN<br>LPIGQADEMQRYVEENQTRNKHINPNEWVKVYSSVTEFKFLFVSGHFKGNYKAQLTRLNHIITNCNG<br>AVLSVEELLIGGEMIKAGTTLLEEVRRKFNNGEINFAAD                                                                                                                                                                                                                                                                                                                                                                                                                                                                     |
| <b>Target sequence</b>  | AAGAGAAGCAAAGACGTTACTagcatgaaggtaccGTAACGTCTTTGCTTCTCTT                                                                                                                                                                                                                                                                                                                                                                                                                                                                                                                                                                                                                                                                          |



**Supplementary table 2. Juillerat *et al.***

Amino acid sequences of N-terminal (including a NLS and a HA tag) domain, central DNA binding core and C-terminal (including FokI) domains of the BurrH-based nuclease (bn18473) targeting AvrBs3 sequence.

|                                 |                                                                                                                                                                                                                                                                                                                                                                                                                                                                                                                                                                                                                                              |
|---------------------------------|----------------------------------------------------------------------------------------------------------------------------------------------------------------------------------------------------------------------------------------------------------------------------------------------------------------------------------------------------------------------------------------------------------------------------------------------------------------------------------------------------------------------------------------------------------------------------------------------------------------------------------------------|
| <b>Nter<br/>Sequence</b>        | MGDPKKKRKVIDYPYDVPDYAIDIASTAFVDQDKQMANRLNLSPLERSKIEKQYGGATTLAFISNKQ<br>NELAQILSRADILKIASYDCAAHALQAVLDCGPMLGKRG                                                                                                                                                                                                                                                                                                                                                                                                                                                                                                                               |
| <b>DNA<br/>binding<br/>core</b> | FSQSDIVKIAGHDGGAQALQAVLDLESMLGKRGFSRDDIAKMAGNGGGAQTLQAVLDLESAPFRERGF<br>SQADIVKIAGNIGGAQALYSVLDVEPTLGKRGFSRADIVKIAGNGGGAQALHTVLDLEPALGKRGFS<br>RIDIVKIAANIGGAQALHAVLDLGPTRLRECGFSQATIAGNIGGAQALQMVLDLGPALGKRGFSQ<br>ATIAGNIGGAQALQTVLDLEPALCERGFSGATIAKMAGHDGGAQALQTVLDLEPALRKRDFRQA<br>DIIKIAGHDGGAQALQAVIEHGPTLRQHGFNLADIVKMAGNGGGAQALQAVLDLKPVLDEHGFSPD<br>IVKMAGNIGGAQALQAVLSLGPALRERGFSPDIVKIAGNIGGAQALQAVLDLELTLVEHGFSPADI<br>VKIAGHDGGTQALHAVLDLERMLGERGFSRADIVNVAGHDGGAQALKAVLEHEATLNERGFSRADIV<br>KIAGHDGGAQALKAVLEHEATLDERGFSRADIVNVAGNGGGAQALKAVLEHEATLNERGFNLTDIVE<br>MAAHDGGAQALKAVLEHGPTLRQRGLSLIDIVEIAGNGGGAQALKAVLKYGPVLMQAG |
| <b>Cter<br/>Sequence</b>        | RSNEEIVHVAARRGGAGRIRKMOVAPLLERQGRSGSDPISRSQIVKSELEEKKSELRHKLKYPHEYI<br>ELIEIARNSTQDRILEMKVMEFFMKVYGYRGKHLGGSRKPDGAIYTVGSPIDYGVIVDTKAYSGGYN<br>LPIGQADEMQRVVEENQTRNKHINPNEWVKVYSSVTEFKFLFVSGHFKGNYKAQLTRLNHIITNCNG<br>AVLSVEELLIGGEMIKAGTLTLEEVRRKF'NNGEINFAAD                                                                                                                                                                                                                                                                                                                                                                                |

**Supplementary table 3. Juillerat et al.**

Amino acid sequences of N-terminal (including a NLS and a HA tag) domain, central DNA binding core and C-terminal (including FokI) domains of the control TALEN targeting AvrBs3 sequence.

|                         |                                                                                                                                                                                                                                                                                                                                                                                                                                                                                                                                                                                                                                                            |
|-------------------------|------------------------------------------------------------------------------------------------------------------------------------------------------------------------------------------------------------------------------------------------------------------------------------------------------------------------------------------------------------------------------------------------------------------------------------------------------------------------------------------------------------------------------------------------------------------------------------------------------------------------------------------------------------|
| <b>Nter Sequence</b>    | MADPIRSRTPSPARELLPGPQPDGVQPTADRGVSPAGGPLDGLPARRTMSRTRLSPSPAPSPAFSA<br>GSFSDLLRQFDPSLFNTSLFDSLPPFGAHHTEAATGEWDEVQSGLRAADAPPPTMRVAVTAARPPRA<br>KPAPRRRAAQPSDASPAAQVDLRLTLGYSQQQQEKIKPKVVRSTVAQHHEALVGHGFTHAHIVALSQHP<br>AALGTVAVKYQDMIAALPEATHEAIVGVGKQWSGARALEALLTVAGELRGPPLQLDTGQLLKIAKRG<br>GVTAVEAVHAWRNALTGAPLN                                                                                                                                                                                                                                                                                                                                         |
| <b>DNA binding core</b> | LTPEQVVAIASHDGGKQALETVQRLLPVLCQAHGLTPQQVVAIASNNGGGKQALETVQRLLPVLCQAH<br>GLTPEQVVAIASNIGGKQALETVQALLPVLCQAHGLTPQQVVAIASNNGGGKQALETVQRLLPVLCQA<br>HGLTPEQVVAIASNIGGKQALETVQALLPVLCQAHGLTPEQVVAIASNIGGKQALETVQALLPVLCQ<br>AHGLTPEQVVAIASNIGGKQALETVQALLPVLCQAHGLTPEQVVAIASHDGGKQALETVQRLLPVLC<br>QAHGLTPEQVVAIASHDGGKQALETVQRLLPVLCQAHGLTPQQVVAIASNNGGGKQALETVQRLLPV<br>CQAHGLTPEQVVAIASNIGGKQALETVQALLPVLCQAHGLTPEQVVAIASNIGGKQALETVQALLPV<br>LCQAHGLTPEQVVAIASHDGGKQALETVQRLLPVLCQAHGLTPEQVVAIASHDGGKQALETVQRLLP<br>VLCQAHGLTPEQVVAIASHDGGKQALETVQRLLPVLCQAHGLTPQQVVAIASNNGGGKQALETVQRLL<br>PVLCQAHGLTPEQVVAIASHDGGKQALETVQRLLPVLCQAHGLTPQQVVAIASNNGGGRPALE |
| <b>Cter Sequence</b>    | SIVAQLSRPDPALAALTDNLVALACLGGPALDAVKKGLPHAPALIKRTRNRRIPERTSHRVADHAQ<br>VVRVLGFQCHSHPAQAFDDAMTQFGMSRHGLLQLFRRVGVTELEARSGLTPPASQRWDRILQASGM<br>KRAKPSPTSTQTPDQASLHAFADSLERDLDAPSPMHEGDQTRASSRKRSRSDRAVTGPSAQQSFEVR<br>VPEQRDALHPLSWRVKRPRTSIGGGPLDPI SRSQVLKSELEEKKSELRHKLKYVPHEYIELIEIAR<br>NSTQDRILEMKVMEFFMKVYGYRGKHLGGSRKPDGAIYTVGSPIDYGVIVDTKAYSGGYNLPIGQAD<br>EMQRYVEENQTRNKHINPNEWKVPSSVTEFKFLFVSGHFKGNYKAQLTRLNHI TNCNGAVLSVEE<br>LLIGGEMIKAGTLTLEEVRKFNNGEINFAAD                                                                                                                                                                                     |

Amino acid sequences of N-terminal (including a NLS and a HA tag) domain, central DNA binding core and C-terminal (including FokI) domains of the engineered TALEN targeting AvrBs3 sequence.

|                         |                                                                                                                                                                                                                                                                                                                                                                                                                                                                                                                                                                                                                                                            |
|-------------------------|------------------------------------------------------------------------------------------------------------------------------------------------------------------------------------------------------------------------------------------------------------------------------------------------------------------------------------------------------------------------------------------------------------------------------------------------------------------------------------------------------------------------------------------------------------------------------------------------------------------------------------------------------------|
| <b>Nter Sequence</b>    | MADPIRSRTPSPARELLPGPQPDGVQPTADRGVSPAGGPLDGLPARRTMSRTRLSPSPAPSPAFSA<br>GSFSDLLRQFDPSLFNTSLFDSLPPFGAHHTEAATGEWDEVQSGLRAADAPPPTMRVAVTAARPPRA<br>KPAPRRRAAQPSDASPAAQVDLRLTLGYSQQQQEKIKPKVVRSTVAQHHEALVGHGFTHAHIVALSQHP<br>AALGTVAVKYQDMIAALPEATHEAIVGVGKQWSGARALEALLTVAGELRGPPLQLDTGQLLKIAKRG<br>GVTAVEAVHAWRNALTGAPLN                                                                                                                                                                                                                                                                                                                                         |
| <b>DNA binding core</b> | LTPEQVVAIASHDGGKQALETVQRLLPVLCQAHGLTPQQVVAIASNNGGGKQALETVQRLLPVLCQAH<br>GLTPEQVVAIASNIGGKQALETVQALLPVLCQAHGLTPQQVVAIASNNGGGKQALETVQRLLPVLCQA<br>HGLTPEQVVAIASNIGGKQALETVQALLPVLCQAHGLTPEQVVAIASNIGGKQALETVQALLPVLCQ<br>AHGLTPEQVVAIASNIGGKQALETVQALLPVLCQAHGLTPEQVVAIASHDGGKQALETVQRLLPVLC<br>QAHGLTPEQVVAIASHDGGKQALETVQRLLPVLCQAHGLTPQQVVAIASNNGGGKQALETVQRLLPV<br>CQAHGLTPEQVVAIASNIGGKQALETVQALLPVLCQAHGLTPEQVVAIASNIGGKQALETVQALLPV<br>LCQAHGLTPEQVVAIASHDGGKQALETVQRLLPVLCQAHGLTPEQVVAIASHDGGKQALETVQRLLP<br>VLCQAHGLTPEQVVAIASHDGGKQALETVQRLLPVLCQAHGLTPQQVVAIASNNGGGKQALETVQRLL<br>PVLCQAHGLTPEQVVAIASHDGGKQALETVQRLLPVLCQAHGLTPQQVVAIASNNGGGRPALE |
| <b>Cter Sequence</b>    | SIVAQLSRPDPALAALTDNLVALACLGGPALDAVKKGLGDPISRSQVLKSELEEKKSELRHKLKY<br>VPHEYIELIEIARNSTQDRILEMKVMEFFMKVYGYRGKHLGGSRKPDGAIYTVGSPIDYGVIVDTKA<br>YSGGYNLPIGQADEMQRYVEENQTRNKHINPNEWKVPSSVTEFKFLFVSGHFKGNYKAQLTRLNH<br>ITNCNGAVLSVEELLIIGGEMIKAGTLTLEEVRKFNNGEINFAAD                                                                                                                                                                                                                                                                                                                                                                                             |

**Supplementary table 4. Juillerat *et al.***

AvrBs3 target sequences (upper case) with spacer (lower case) length ranging from 5 to 40 base pairs.

| Spacer size | Target sequence                                                              |
|-------------|------------------------------------------------------------------------------|
| 5           | TATATAAACCTAACCTCTaggtAGAGGGTTAGGTTTATATA                                    |
| 6           | TATATAAACCTAACCTCTaaggtAGAGGGTTAGGTTTATATA                                   |
| 7           | TATATAAACCTAACCTCTaaggtacAGAGGGTTAGGTTTATATA                                 |
| 8           | TATATAAACCTAACCTCTgaaggtacAGAGGGTTAGGTTTATATA                                |
| 9           | TATATAAACCTAACCTCTgaaggtaccAGAGGGTTAGGTTTATATA                               |
| 10          | TATATAAACCTAACCTCTtgaaggtaccAGAGGGTTAGGTTTATATA                              |
| 11          | TATATAAACCTAACCTCTtgaaggtacctAGAGGGTTAGGTTTATATA                             |
| 12          | TATATAAACCTAACCTCTatgaaggtacctAGAGGGTTAGGTTTATATA                            |
| 13          | TATATAAACCTAACCTCTatgaaggtaccttAGAGGGTTAGGTTTATATA                           |
| 14          | TATATAAACCTAACCTCTcatgaaggtacctAGAGGGTTAGGTTTATATA                           |
| 15          | TATATAAACCTAACCTCTtagcatgaaggtaccAGAGGGTTAGGTTTATATA                         |
| 16          | TATATAAACCTAACCTCTgcatgaaggtacctgAGAGGGTTAGGTTTATATA                         |
| 17          | TATATAAACCTAACCTCTgcatgaaggtacctgtAGAGGGTTAGGTTTATATA                        |
| 18          | TATATAAACCTAACCTCTagcatgaaggtacctgtAGAGGGTTAGGTTTATATA                       |
| 19          | TATATAAACCTAACCTCTagcatgaaggtacctgtcAGAGGGTTAGGTTTATATA                      |
| 20          | TATATAAACCTAACCTCTtagcatgaaggtacctgtcAGAGGGTTAGGTTTATATA                     |
| 21          | TATATAAACCTAACCTCTtagcatgaaggtacctgtcgAGAGGGTTAGGTTTATATA                    |
| 22          | TATATAAACCTAACCTCTtagcatgaaggtacctgtcgtAGAGGGTTAGGTTTATATA                   |
| 23          | TATATAAACCTAACCTCTtagcatgaaggtacctgtcgtAGAGGGTTAGGTTTATATA                   |
| 24          | TATATAAACCTAACCTCTtagcatgaaggtacctgtcgttAGAGGGTTAGGTTTATATA                  |
| 25          | TATATAAACCTAACCTCTactagcatgaaggtacctgtcgttAGAGGGTTAGGTTTATATA                |
| 26          | TATATAAACCTAACCTCTactagcatgaaggtacctgtcgttAGAGGGTTAGGTTTATATA                |
| 27          | TATATAAACCTAACCTCTcactagcatgaaggtacctgtcgttAGAGGGTTAGGTTTATATA               |
| 28          | TATATAAACCTAACCTCTcactagcatgaaggtacctgtcgttgaAGAGGGTTAGGTTTATATA             |
| 29          | TATATAAACCTAACCTCTccactagcatgaaggtacctgtcgttgaAGAGGGTTAGGTTTATATA            |
| 30          | TATATAAACCTAACCTCTccactagcatgaaggtacctgtcgttgatAGAGGGTTAGGTTTATATA           |
| 31          | TATATAAACCTAACCTCTaccactagcatgaaggtacctgtcgttgatAGAGGGTTAGGTTTATATA          |
| 32          | TATATAAACCTAACCTCTaccactagcatgaaggtacctgtcgttgattAGAGGGTTAGGTTTATATA         |
| 33          | TATATAAACCTAACCTCTgaccactagcatgaaggtacctgtcgttgattAGAGGGTTAGGTTTATATA        |
| 34          | TATATAAACCTAACCTCTgaccactagcatgaaggtacctgtcgttgattcAGAGGGTTAGGTTTATATA       |
| 35          | TATATAAACCTAACCTCTtgaccactagcatgaaggtacctgtcgttgattcAGAGGGTTAGGTTTATATA      |
| 36          | TATATAAACCTAACCTCTtgaccactagcatgaaggtacctgtcgttgattcaAGAGGGTTAGGTTTATATA     |
| 37          | TATATAAACCTAACCTCTctgaccactagcatgaaggtacctgtcgttgattcaAGAGGGTTAGGTTTATATA    |
| 38          | TATATAAACCTAACCTCTctgaccactagcatgaaggtacctgtcgttgattcagAGAGGGTTAGGTTTATATA   |
| 39          | TATATAAACCTAACCTCTtctgaccactagcatgaaggtacctgtcgttgattcagAGAGGGTTAGGTTTATATA  |
| 40          | TATATAAACCTAACCTCTtctgaccactagcatgaaggtacctgtcgttgattcagtAGAGGGTTAGGTTTATATA |

**Supplementary table 5. Juillerat *et al.***

Sequences of the targets that contained mismatches. Binding sites are represented in upper case and spacer in lower case. Mismatches are highlighted in grey boxes

| name | Target sequence                                          |
|------|----------------------------------------------------------|
| tAvr | ATATAAACCTAACCTCTtagcatgaaggtaccAGAGGGTTAGGTTTATAT       |
| mt1  | ATATAAACCTAACCTCAtagcatgaaggtaccTGAGGGTTAGGTTTATAT       |
| mt2  | ATATAAACCTAACCTCCtagcatgaaggtaccGGAGGGTTAGGTTTATAT       |
| mt3  | ATATAAACCTAACCTCGtagcatgaaggtaccCGAGGGTTAGGTTTATAT       |
| mt4  | ATATAAACCTGACCCTTtagcatgaaggtaccAGAGGGTTAGGTTTATAT       |
| mt5  | ATATAAACCTAACCAATCCtagcatgaaggtaccAGAGGGTTAGGTTTATAT     |
| mt6  | CTCTATCTCACCCCTTtagcatgaaggtaccAGAGGGTTAGGTTTATAT        |
| mt7  | TTATAGAGCTAAAGTATcatcagttaacattataaatgATAACTTTAGCTCTATAC |
| mt8  | TTTACACCTGCAGCTCTcattttccatacagtcagtAGAGCTGCAGGTGTACAA   |
| mt9  | CTCTATCTCACCCCTTtagcatgaaggtacctgtcgAAAGGGTTCAGATAGAG    |

**Supplementary table 6. Juillerat *et al.***

Amino acid sequences of N-terminal (including a NLS and a HA tag) domain, central DNA binding core and C-terminal (including FokI) domains of the 20 modules BurrH-based nuclease targeting CAPNS1 (left arm) with the targeted sequence.

|                         |                                                                                                                                                                                                                                                                                                                                                                                                                                                                                                                                                                                                                                                                                                                                       |
|-------------------------|---------------------------------------------------------------------------------------------------------------------------------------------------------------------------------------------------------------------------------------------------------------------------------------------------------------------------------------------------------------------------------------------------------------------------------------------------------------------------------------------------------------------------------------------------------------------------------------------------------------------------------------------------------------------------------------------------------------------------------------|
| <b>Nter Sequence</b>    | MGDPKPKKRKVIDYPYDVPDYAIDIASTAFVDQDKQMANRLNLSPLERSKIEKQYGGATTLAFISNKQNELAQILSRADILKIASYDCAAHALQAVLDCGPMLGKRG                                                                                                                                                                                                                                                                                                                                                                                                                                                                                                                                                                                                                           |
| <b>DNA binding core</b> | FSQSDIVKVIAGNNGGAQALQAVLDLESMLGKRGFSRDDIAKMAGNNGGAQTLQAVLDLESAPFRERGF<br>SQADIVKVIAGNNGGAQALYSVLDVEPTLTKRGFSRADIVKVIAGNNGGAQALHTVLDLEPALGKRGFS<br>RIDIVKIAAHDGGAQALHAVLDLGPTRLRECGFSQATIAKIAGHDGGAQALQMVLDLGPALGKRGFSQ<br>ATIAKIAGNNGGAQALQTVLDLEPALCERGFSSQATIAKMAGNNGGAQALQTVLDLEPALRKRDFRQA<br>DIIKIAGNNGGAQALQAVIEHGPTLRQHGFNLADIVKMAGNIGGAQALQAVLDLKPVLDEHGFSQPD<br>IVKMAGNIGGAQALQAVLSLGPALRERGFSSQPDIVKVIAGHDGGAQALQAVLDLELTLVEHGFSQPD<br>VRITGHDGGAQALQAVLLELTLRERGFSSQPDIVKVIAGHDGGAQALQAVLDLELTLFRERGFSSQADIV<br>KIAGNIGGTQALHAVLDLERMLGERGFSSRADIVNVAGNNGGAQALKAVLEHEATLNERGFSSRADIVK<br>IAGNIGGAQALKAVLEHEATLDERGFSSRADIVRIAGNNGGAQALKAVLEHGPTLNERGFNLTDIVEM<br>AAHDGGAQALKAVLEHGPTLRQRGLSLIDIVEIASNNGGAQALKAVLKYGPVLMQAG |
| <b>Cter Sequence</b>    | RSNEEIVHVAARRGGAGRIRKMVAPLLERQGRSGSDPISRSQLVKSELEEKKSELRHKLKYPHEYY<br>ELIEIARNSTQDRILEMKVMEFFMKVYGYRGKHLGGSRKPDGAIYTVGSPIDYGVIVDTKAYSSGGYN<br>LPIGQADEMQRYVEENQTRNKHINPNEWKVPYSSVTEFKFLFVSGHFKGNYKAQLTRLNHIITCNG<br>AVLSVEELLIGGEMIKAGTTLLEEVRRKFNNGEINFAAD                                                                                                                                                                                                                                                                                                                                                                                                                                                                           |
| <b>Target sequence</b>  | TTGTCCGGAACCCAGAGCT                                                                                                                                                                                                                                                                                                                                                                                                                                                                                                                                                                                                                                                                                                                   |

Amino acid sequences of N-terminal (including a NLS and a S tag) domain, central DNA binding core and C-terminal (including FokI) domains of the 20 modules BurrH-based nuclease targeting CAPNS1 (right arm) with the targeted sequence.

|                         |                                                                                                                                                                                                                                                                                                                                                                                                                                                                                                                                                                                                                                                                                                                                       |
|-------------------------|---------------------------------------------------------------------------------------------------------------------------------------------------------------------------------------------------------------------------------------------------------------------------------------------------------------------------------------------------------------------------------------------------------------------------------------------------------------------------------------------------------------------------------------------------------------------------------------------------------------------------------------------------------------------------------------------------------------------------------------|
| <b>Nter Sequence</b>    | MGDPKPKKRKVIDKETAAAKFERQHMDSIDIASTAFVDQDKQMANRLNLSPLERSKIEKQYGGATTLA<br>FISNKQNELAQILSRADILKIASYDCAAHALQAVLDCGPMLGKRG                                                                                                                                                                                                                                                                                                                                                                                                                                                                                                                                                                                                                 |
| <b>DNA binding core</b> | FSQSDIVKVIAGNNGGAQALQAVLDLESMLGKRGFSRDDIAKMAGNNGGAQTLQAVLDLESAPFRERGF<br>SQADIVKVIAGHDGGAQALYSVLDVEPTLTKRGFSRADIVKVIAGNNGGAQALHTVLDLEPALGKRGFS<br>RIDIVKIAAHDGGAQALHAVLDLGPTRLRECGFSQATIAKIAGNNGGAQALQMVLDLGPALGKRGFSQ<br>ATIAKIAGNNGGAQALQTVLDLEPALCERGFSSQATIAKMAGNNGGAQALQTVLDLEPALRKRDFRQA<br>DIIKIAGNNGGAQALQAVIEHGPTLRQHGFNLADIVKMAGNNGGAQALQAVLDLKPVLDEHGFSQPD<br>IVKMAGNNGGAQALQAVLSLGPALRERGFSSQPDIVKVIAGHDGGAQALQAVLDLELTLVEHGFSQPD<br>VRITGNGGGAQALQAVLLELTLRERGFSSQPDIVKVIAGHDGGAQALQAVLDLELTLFRERGFSSQADIV<br>KIAGNNGGTQALHAVLDLERMLGERGFSSRADIVNVAGNNGGAQALKAVLEHEATLNERGFSSRADIVK<br>IAGNNGGAQALKAVLEHEATLDERGFSSRADIVRIAGNNGGAQALKAVLEHGPTLNERGFNLTDIVEM<br>AAHDGGAQALKAVLEHGPTLRQRGLSLIDIVEIASNNGGAQALKAVLKYGPVLMQAG |
| <b>Cter Sequence</b>    | RSNEEIVHVAARRGGAGRIRKMVAPLLERQGRSGSDPISRSQLVKSELEEKKSELRHKLKYPHEYY<br>ELIEIARNSTQDRILEMKVMEFFMKVYGYRGKHLGGSRKPDGAIYTVGSPIDYGVIVDTKAYSSGGYN<br>LPIGQADEMQRYVEENQTRNKHINPNEWKVPYSSVTEFKFLFVSGHFKGNYKAQLTRLNHIITCNG<br>AVLSVEELLIGGEMIKAGTTLLEEVRRKFNNGEINFAAD                                                                                                                                                                                                                                                                                                                                                                                                                                                                           |
| <b>Target sequence</b>  | GGCTCTGTGGGCTCGGGTCT                                                                                                                                                                                                                                                                                                                                                                                                                                                                                                                                                                                                                                                                                                                  |

**Supplementary table 7. Juillerat *et al.***

Amino acid sequences of N-terminal (including a NLS and a HA tag) domain, central DNA binding core and C-terminal (including FokI) domains of the 18 modules BurrH-based nuclease targeting CAPNS1 (left arm) with the targeted sequence.

|                         |                                                                                                                                                                                                                                                                                                                                                                                                                                                                                                                                                                                                                                            |
|-------------------------|--------------------------------------------------------------------------------------------------------------------------------------------------------------------------------------------------------------------------------------------------------------------------------------------------------------------------------------------------------------------------------------------------------------------------------------------------------------------------------------------------------------------------------------------------------------------------------------------------------------------------------------------|
| <b>Nter Sequence</b>    | MGDPKPKKRKVIDYPYDVPDYAIDIASTAFVDQDKQMANRLNLSPLERSKIEKQYGGATTLAFISNKQNELAQILSRADILKIASYDCAAHALQAVLDCGPMLGKRG                                                                                                                                                                                                                                                                                                                                                                                                                                                                                                                                |
| <b>DNA binding core</b> | FSQSDIVK IAGHDGGAQALQAVLDLESMLGKRGFSRDDIAKMAGNGGGAQTLQAVLDLES AFRERGF SQADIVK IAGHDGGAQALYSVLDVEPTLGKRGFSRADIVK IAGHDGGAQALHTVLDLEPALGKRGFS RIDIVK IAAANNNGGAQALHAVLDLGP TLRECGFSQATIAKIAGNNGGAQALQMVL DLGPALGKRGFSQ ATIAKIAGNNGGAQALQTVLDLEPALCERGF SQATIAKMAGNIGGAQALQTVLDLEPALRKRDFRQA DI I KIAGNIGGAQALQAVIEHGPTLRQHGFNLADIVKMAGHDGGAQALQAVLDLKPVLDEHGFSQPD IVKMAGHDGGAQALQAVLSLGPALRERGF SQPDIVK IAGHDGGAQALQAVLDLELTLVEHGFSQADI VKIAGNIGGTQALHAVLDLERMLGERGF SRADIVNVAGNNGGAQALKAVLEHEATLNERGF SRADIV KIAGNIGGAQALKAVLEHEATLDERGF SRADIVNVAGNNGGAQALKAVLEHEATLNERGFNLTDIVE MAAHDGGAQALKAVLEHGPTLRQGLSLIDIVEIAGNGGGAQALKAVLKYGPVLMQAG |
| <b>Cter Sequence</b>    | RSNEEIVHVAARRGGAGRIRKMOVAPLLERQGRSGSDPISRSQLVKSELEEKKSELRHKLKYPHEYYIELIEIARNSTQDRILEMKVMEFFMKVYGYRGKHLGGSRKPDGAIYTVGSPIDYGVIVDTKAYSGGYNLP I GQADEMQRYVEENQTRNKHINPNEWKVPYSSVTEFKFLFVSGHFKNYKAQLTRLNHIITNCNGAVLSVEELLIGGEMIKAGTTLTLEEVRKFNNGEINFAAD                                                                                                                                                                                                                                                                                                                                                                                         |
| <b>Target sequence</b>  | GTCCGGGAACCCAGAGCT                                                                                                                                                                                                                                                                                                                                                                                                                                                                                                                                                                                                                         |

Amino acid sequences of N-terminal (including a NLS and a S tag) domain, central DNA binding core and C-terminal (including FokI) domains of the 18 modules BurrH-based nuclease targeting CAPNS1 (right arm) with the targeted sequence.

|                         |                                                                                                                                                                                                                                                                                                                                                                                                                                                                                                                                                                                                                                              |
|-------------------------|----------------------------------------------------------------------------------------------------------------------------------------------------------------------------------------------------------------------------------------------------------------------------------------------------------------------------------------------------------------------------------------------------------------------------------------------------------------------------------------------------------------------------------------------------------------------------------------------------------------------------------------------|
| <b>Nter Sequence</b>    | MGDPKPKKRKVIDKETAAAKFERQHMSIDIASTAFVDQDKQMANRLNLSPLERSKIEKQYGGATTLAFISNKQNELAQILSRADILKIASYDCAAHALQAVLDCGPMLGKRG                                                                                                                                                                                                                                                                                                                                                                                                                                                                                                                             |
| <b>DNA binding core</b> | FSQSDIVK IAGHDGGAQALQAVLDLESMLGKRGFSRDDIAKMAGNGGGAQTLQAVLDLES AFRERGF SQADIVK IAGHDGGAQALYSVLDVEPTLGKRGFSRADIVK IAGNGGGAQALHTVLDLEPALGKRGFS RIDIVK IAAANNNGGAQALHAVLDLGP TLRECGFSQATIAKIAGNNGGGAQALQMVL DLGPALGKRGFSQ ATIAKIAGNNGGAQALQTVLDLEPALCERGF SQATIAKMAGNNGGAQALQTVLDLEPALRKRDFRQA DI I KIAGNNGGAQALQAVIEHGPTLRQHGFNLADIVKMAGHDGGAQALQAVLDLKPVLDEHGFSQPD IVKMAGNGGGAQALQAVLSLGPALRERGF SQPDIVK IAGHDGGAQALQAVLDLELTLVEHGFSQADI VKIAGNNGGTQALHAVLDLERMLGERGF SRADIVNVAGNNGGAQALKAVLEHEATLNERGF SRADIV KIAGNNGGAQALKAVLEHEATLDERGF SRADIVNVAGNNGGGAQALKAVLEHEATLNERGFNLTDIVE MAAHDGGAQALKAVLEHGPTLRQGLSLIDIVEIAGNGGGAQALKAVLKYGPVLMQAG |
| <b>Cter Sequence</b>    | RSNEEIVHVAARRGGAGRIRKMOVAPLLERQGRSGSDPISRSQLVKSELEEKKSELRHKLKYPHEYYIELIEIARNSTQDRILEMKVMEFFMKVYGYRGKHLGGSRKPDGAIYTVGSPIDYGVIVDTKAYSGGYNLP I GQADEMQRYVEENQTRNKHINPNEWKVPYSSVTEFKFLFVSGHFKNYKAQLTRLNHIITNCNGAVLSVEELLIGGEMIKAGTTLTLEEVRKFNNGEINFAAD                                                                                                                                                                                                                                                                                                                                                                                           |
| <b>Target sequence</b>  | CTCTGTGGGCTCGGGTCT                                                                                                                                                                                                                                                                                                                                                                                                                                                                                                                                                                                                                           |

**Supplementary table 8. Juillerat *et al.***

Amino acid sequences of N-terminal (including a NLS and a HA tag) domain, central DNA binding core and C-terminal (including FokI) domains of the TALEN targeting CAPNS1 (left arm) with the targeted sequence. T0 is indicated in brackets.

|                         |                                                                                                                                                                                                                                                                                                                                                                                                                                                                                 |
|-------------------------|---------------------------------------------------------------------------------------------------------------------------------------------------------------------------------------------------------------------------------------------------------------------------------------------------------------------------------------------------------------------------------------------------------------------------------------------------------------------------------|
| <b>Nter Sequence</b>    | MGDPKPKKRKVIDYPYDVPDYAIDIADPIRSRTPSPARELLPGPQPDGVQPTADRGVSPAGGGLDGLPARRTMSRTRLPSPPAPSPAFSAGSFSDDLRLQFDPSLFNLSLFDLSLPPFGAHHTEAATGEWDEVQSGLRAADAPPPTMRVAVTAARPPRAKPAPRRRAAQPSDASPAAQVDLRTLGYSSQQQEKIKPKVRSTVAQHHEALVGHGFTHAHIVALSQHPAALGTAVVKYQDMIAALPEATHEAIVGVGKQWSGARALEALLTVAGELRGPPLQLDTGQLLKIAKRGGVTAVEAVHAWRNALTGAPLN                                                                                                                                                      |
| <b>DNA binding core</b> | LTPEQVVAIASHDGGKQALETVQRLLPVLCQAHGLTPEQVVAIASHDGGKQALETVQRLLPVLCQAHGLTPQQVVAIASNNGGKQALETVQRLLPVLCQAHGLTPQQVVAIASNNGGKQALETVQRLLPVLCQAHGLTPQQVVAIASNNGGKQALETVQRLLPVLCQAHGLTPEQVVAIASNIGGKQALETVQALLPVLCQAHGLTPEQVVAIASHDGGKQALETVQRLLPVLCQAHGLTPEQVVAIASHDGGKQALETVQRLLPVLCQAHGLTPEQVVAIASNIGGKQALETVQALLPVLCQAHGLTPQQVVAIASNNGGKQALETVQRLLPVLCQAHGLTPEQVVAIASNIGGKQALETVQALLPVLCQAHGLTPQQVVAIASNNGGKQALETVQRLLPVLCQAHGLTPEQVVAIASHDGGKQALETVQRLLPVLCQAHGLTPQQVVAIASNNGGGRPALE |
| <b>Cter Sequence</b>    | SIVAQLSRPDPALAALTNDHLVALACLGGRPALDAVKKGLGDPISRSQLVKSELEEKKSELRHKLKYPHEYIELIEIARNSTQDRILEMKVMEFFMKVYGYRGKHLGGSRKPDGAIYTVGSPIDYGVIVDTKAYSGGYNLPIGQADEMQRYVEENQTRNKHINPNEWVKVYSSVTEFKFLFVSGHFKNYKAQLTRLNHITNCNGAVLSVEELLIGGEMIKAGTTLLEEVRKFNNGEINFAAD                                                                                                                                                                                                                              |
| <b>Target sequence</b>  | (T) CCGGAACCCAGAGCT                                                                                                                                                                                                                                                                                                                                                                                                                                                             |

Amino acid sequences of N-terminal (including a NLS and a S tag) domain, central DNA binding core and C-terminal (including FokI) domains of the TALEN targeting CAPNS1 (right arm) with the targeted sequence.

|                         |                                                                                                                                                                                                                                                                                                                                                                           |
|-------------------------|---------------------------------------------------------------------------------------------------------------------------------------------------------------------------------------------------------------------------------------------------------------------------------------------------------------------------------------------------------------------------|
| <b>Nter Sequence</b>    | MGDPKPKKRKVIDKETAAAKFERQHMSIDIDIADPIRSRTPSPARELLPGPQPDGVQPTADRGVSPAGGGLDGLPARRTMSRTRLPSPPAPSPAFSAGSFSDDLRLQFDPSLFNLSLFDLSLPPFGAHHTEAATGEWDEVQSGLRAADAPPPTMRVAVTAARPPRAKPAPRRRAAQPSDASPAAQVDLRTLGYSSQQQEKIKPKVRSTVAQHHEALVGHGFTHAHIVALSQHPAALGTAVVKYQDMIAALPEATHEAIVGVGKQWSGARALEALLTVAGELRGPPLQLDTGQLLKIAKRGGVTAVEAVHAWRNALTGAPLN                                         |
| <b>DNA binding core</b> | LTPEQVVAIASHDGGKQALETVQRLLPVLCQAHGLTPQQVVAIASNNGGKQALETVQRLLPVLCQAHGLTPQQVVAIASNNGGKQALETVQRLLPVLCQAHGLTPQQVVAIASNNGGKQALETVQRLLPVLCQAHGLTPQQVVAIASNNGGKQALETVQRLLPVLCQAHGLTPEQVVAIASHDGGKQALETVQRLLPVLCQAHGLTPQQVVAIASNNGGKQALETVQRLLPVLCQAHGLTPEQVVAIASHDGGKQALETVQRLLPVLCQAHGLTPQQVVAIASNNGGKQALETVQRLLPVLCQAHGLTPEQVVAIASHDGGKQALETVQRLLPVLCQAHGLTPQQVVAIASNNGGGRPALE |
| <b>Cter Sequence</b>    | SIVAQLSRPDPALAALTNDHLVALACLGGRPALDAVKKGLGDPISRSQLVKSELEEKKSELRHKLKYPHEYIELIEIARNSTQDRILEMKVMEFFMKVYGYRGKHLGGSRKPDGAIYTVGSPIDYGVIVDTKAYSGGYNLPIGQADEMQRYVEENQTRNKHINPNEWVKVYSSVTEFKFLFVSGHFKNYKAQLTRLNHITNCNGAVLSVEELLIGGEMIKAGTTLLEEVRKFNNGEINFAAD                                                                                                                        |
| <b>Target sequence</b>  | (T) CTGTGGGCTCGGGTCT                                                                                                                                                                                                                                                                                                                                                      |

**Supplementary table 9. Juillerat *et al.***

Oligonucleotides used to amplify the CAPNS1 locus in targeted mutagenesis experiments and to identify Knock-in positive clones in Targeted Gene Insertion experiments.

|                               |                   |                                                                 |
|-------------------------------|-------------------|-----------------------------------------------------------------|
| <b>Targeted mutagenesis</b>   | <b>Forward -1</b> | CCATCTCATCCCTGCGTGTCTCCGACTCAGTACTGAGCTAcgaaccctcagacctgttcgatc |
|                               | <b>Forward -2</b> | CCATCTCATCCCTGCGTGTCTCCGACTCAGCATAGTAGTGcgaaccctcagacctgttcgatc |
|                               | <b>Reverse</b>    | CCTATCCCCTGTGTGCCTTGGCAGTCTCAGgtgagatccagagcccagcctg            |
| <b>Tageted Gene Insertion</b> | <b>R1</b>         | AATTGCGGCCGCGGTCCGGCGC                                          |
|                               | <b>F1</b>         | AAAAAGGCCGGTAGCCCATAACC                                         |
|                               | <b>R2</b>         | GCCGCCGCCGCCCTTCAAGAACGAGTTAACC                                 |
|                               | <b>F2</b>         | TTAAGGCGCGCCGGACCGCGGC                                          |
